## **A gene expression-based diagnostic classifier for identification of severe COVID-19 and multisystem inflammatory syndrome in children (MIS-C)**

Alicia Sotomayor-Gonzalez<sup>1#</sup>, Conor J. Loy<sup>2#</sup>, Jenny Nguyen<sup>1#</sup>, Venice Servellita<sup>1#</sup>, Sanchita Bhattacharya<sup>4</sup>, Joan Lenz<sup>2</sup>, Meagan Williams<sup>5</sup>, Will Suslovic<sup>5</sup>, Alexandre P. Cheng<sup>2</sup>, Andrew Bliss<sup>2</sup>, Prachi Saldhi<sup>1</sup>, Jessica Streithorst<sup>1</sup>, Hee Jae Huh<sup>1</sup>, Abiodun Foresythe<sup>2</sup>, Miriam Oseguera<sup>1</sup>, Katrina de la Cruz<sup>1</sup>, Noah Brazer<sup>1</sup>, Nathan Wood<sup>3</sup>, Charlotte Hsieh<sup>3</sup>, Burak Bahar<sup>5</sup>, Amelia Gliwa<sup>1</sup>, Kushmita Bhakta<sup>7</sup>, Maria A. Perez<sup>7</sup>, Evan J. Anderson<sup>7,8</sup>, Ann Chahroudi<sup>7</sup>, Meghan Delaney<sup>5</sup>, Atul J. Butte<sup>4</sup>, Roberta DeBiasi<sup>5</sup>, Christina A. Rostad<sup>7</sup>, Iwijn De Vlaminck<sup>2\*</sup>, Charles Chiu<sup>1,9\*</sup>.

### Affiliations:

<sup>1</sup>Department of Laboratory Medicine, University of California, San Francisco, San Francisco, CA, USA

<sup>2</sup>Meinig School of Biomedical Engineering, Cornell University, Ithaca, NY, USA

<sup>3</sup>UCSF Benioff Children's Hospital, Oakland, CA, USA

<sup>4</sup>Bakar Computational Health Sciences Institute, University of California, San Francisco, San Francisco, CA, USA

<sup>5</sup>Children's National Hospital, Washington D.C., USA

<sup>6</sup>Department of Pediatrics and Center for Childhood Infections at Vaccines, Emory University School of Medicine and Children's Healthcare of Atlanta, Atlanta, GA, USA-

<sup>7</sup>Department of Medicine, Emory University School of Medicine, Atlanta, GA, US

<sup>8</sup>Department of Medicine, Division of Infectious Diseases, University of California, San Francisco, San Francisco, CA, USA

#These authors contributed equally

\*Co-corresponding authors: [charles.chiu@ucsf.edu](mailto:charles.chiu@ucsf.edu), [id93@cornell.edu](mailto:id93@cornell.edu)

The authors have withdrawn their manuscript owing to data from patients who had not been consented being inadvertently used in the preprint. This has been corrected in the version of the study published in Cell Reports Medicine. Therefore, the authors do not wish this work to be cited as reference for the project. If you have any questions, please contact the corresponding author.
